# Supplementary material for: Reactions to graphic health warnings in the United States
Source: Oxford University Press journal article supplement (doi:10.1093/her/cyu036), 2014-06-27
Supplement: cyu036_supplementary_data.zip [file cyu036_supplementary_data.zip]

**Appendix 1**

Table A.1 Warning Statements

---

WARNING: Cigarettes are addictive.

WARNING: Tobacco smoke can harm your children.

WARNING: Cigarettes cause fatal lung disease.

WARNING: Cigarettes cause cancer.

WARNING: Cigarettes cause strokes and heart disease.

WARNING: Smoking during pregnancy can harm your baby.

WARNING: Smoking can kill you.

WARNING: Tobacco smoke causes fatal lung disease in nonsmokers.

WARNING: Quitting smoking now greatly reduces serious risks to your health.

---

## Appendix 2

Figure A. 1 View of hypothetical pack of cigarettes – control version (statement only) for warning statement 1

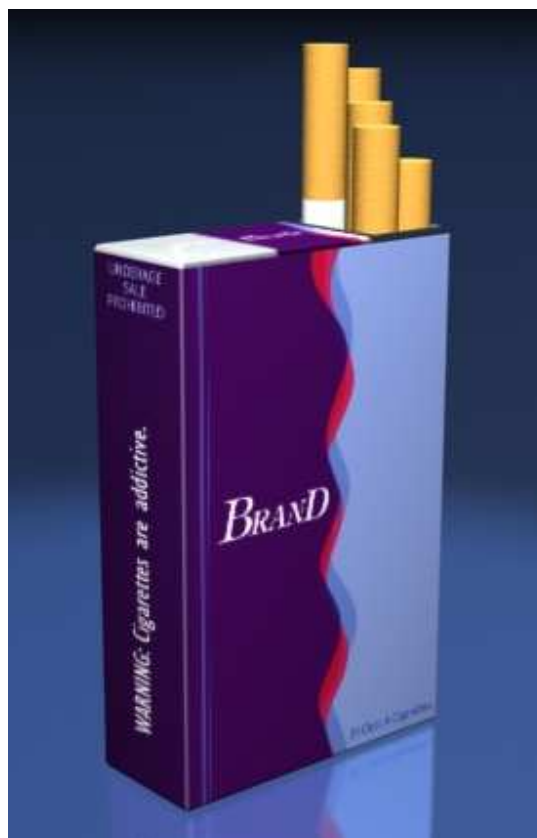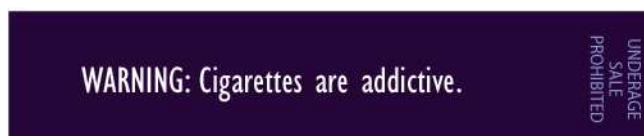

Figure A.2 Front view of each image on hypothetical cigarette pack (treatment conditions)

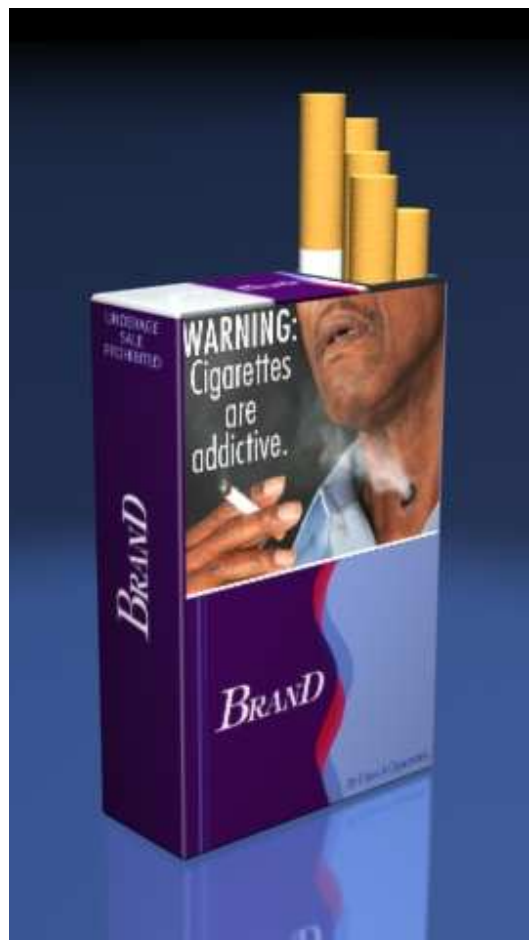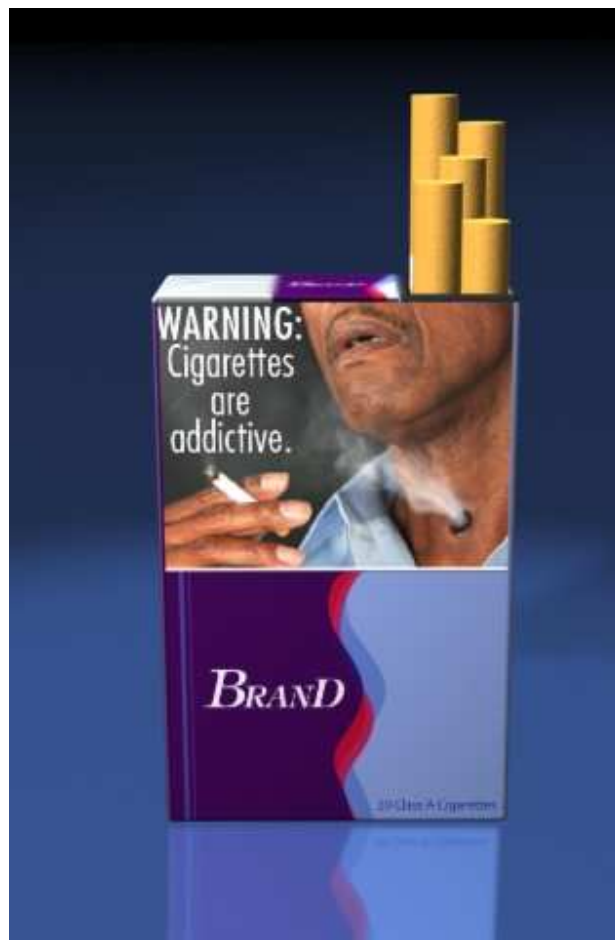

**Appendix 2 table 1. Reaction and Belief Scales to Warning Statement “Cigarettes Are Addictive”, by Sample**

| Explanatory Variable                 | Warning 1 - Cigarettes Are Addictive |                      |                     |                          |                     |                     |                                                     |                   |                   |                                                            |                   |                     |
|--------------------------------------|--------------------------------------|----------------------|---------------------|--------------------------|---------------------|---------------------|-----------------------------------------------------|-------------------|-------------------|------------------------------------------------------------|-------------------|---------------------|
|                                      | Emotional reaction scale             |                      |                     | Cognitive reaction scale |                     |                     | Beliefs about health risks to regular smokers scale |                   |                   | Beliefs about health risks from regular SHS exposure scale |                   |                     |
|                                      | Adult                                | Young Adult          | Youth               | Adult                    | Young Adult         | Youth               | Adult                                               | Young Adult       | Youth             | Adult                                                      | Young Adult       | Youth               |
| <b>Graphic warning vs. text only</b> | 6.952***<br>(0.000)                  | 7.176***<br>(0.000)  | 4.684***<br>(0.000) | 2.645***<br>(0.000)      | 2.445***<br>(0.000) | 4.210***<br>(0.000) | 1.464*<br>(0.020)                                   | 0.233<br>(0.725)  | 0.146<br>(0.816)  | 1.301*<br>(0.015)                                          | 1.024<br>(0.078)  | -0.321<br>(0.589)   |
| <b>Age</b>                           | 0.023<br>(0.544)                     | 0.061<br>(0.836)     | 0.128<br>(0.697)    | 0.033<br>(0.163)         | -0.044<br>(0.848)   | -0.254<br>(0.255)   | 0.012<br>(0.642)                                    | -0.240<br>(0.300) | -0.105<br>(0.672) | -0.050*<br>(0.036)                                         | -0.035<br>(0.849) | 0.031<br>(0.893)    |
| <b>Gender</b>                        | 0.313<br>(0.731)                     | 0.366<br>(0.681)     | 2.850***<br>(0.001) | 0.085<br>(0.867)         | -0.694<br>(0.302)   | 0.869<br>(0.170)    | -0.326<br>(0.599)                                   | 1.033<br>(0.136)  | 1.633*<br>(0.011) | 0.960<br>(0.084)                                           | 1.203*<br>(0.047) | 1.959***<br>(0.001) |
| <b>Race/ethnicity</b>                |                                      |                      |                     |                          |                     |                     |                                                     |                   |                   |                                                            |                   |                     |
| Black/African American               | -3.927*<br>(0.028)                   | 10.792***<br>(0.000) | -3.084<br>(0.328)   | -1.323<br>(0.123)        | 2.306<br>(0.196)    | -3.394<br>(0.186)   | -1.865<br>(0.127)                                   | 2.602<br>(0.065)  | 1.145<br>(0.473)  | 1.314<br>(0.259)                                           | 2.312<br>(0.134)  | 2.411<br>(0.222)    |
| Hispanic                             | 0.490<br>(0.770)                     | 0.974<br>(0.349)     | -1.662<br>(0.228)   | 0.710<br>(0.407)         | 0.764<br>(0.365)    | 0.412<br>(0.649)    | -0.164<br>(0.883)                                   | -0.939<br>(0.281) | -0.850<br>(0.458) | 0.779<br>(0.413)                                           | -0.317<br>(0.678) | 0.419<br>(0.697)    |
| All other                            | -0.638<br>(0.777)                    | 1.933<br>(0.295)     | 0.259<br>(0.845)    | -1.109<br>(0.282)        | -1.187<br>(0.211)   | 0.593<br>(0.476)    | -1.963<br>(0.089)                                   | 0.798<br>(0.439)  | 1.304<br>(0.104)  | -0.534<br>(0.556)                                          | -0.751<br>(0.509) | 0.879<br>(0.322)    |
| <b>College graduate or greater</b>   | 1.174<br>(0.156)                     | 0.805<br>(0.475)     |                     | -0.077<br>(0.889)        | -0.046<br>(0.952)   |                     | 0.169<br>(0.787)                                    | 0.890<br>(0.343)  |                   | 0.038<br>(0.947)                                           | 0.534<br>(0.479)  |                     |
| <b>Income</b>                        |                                      |                      |                     |                          |                     |                     |                                                     |                   |                   |                                                            |                   |                     |
| Between \$25,000 and \$49,999        | 1.515<br>(0.419)                     | -0.269<br>(0.780)    |                     | -0.692<br>(0.444)        | 0.276<br>(0.733)    |                     | 0.542<br>(0.684)                                    | -0.612<br>(0.470) |                   | 0.350<br>(0.748)                                           | -0.546<br>(0.461) |                     |
| Between \$50,000 and \$74,999        | 0.271                                | -1.400               |                     | -0.095                   | -0.170              |                     | -1.595                                              | -1.001            |                   | 0.245                                                      | -0.901            |                     |

|                                                           |         |         |         |         |         |     |         |         |         |         |         |     |
|-----------------------------------------------------------|---------|---------|---------|---------|---------|-----|---------|---------|---------|---------|---------|-----|
|                                                           | (0.876) | (0.230) |         | (0.918) | (0.858) |     | (0.226) | (0.241) |         | (0.816) | (0.228) |     |
| More than \$75,000                                        | 1.303   | 2.891*  |         | 0.024   | 1.446   |     | 0.106   | 0.395   |         | 0.158   | 1.239   |     |
|                                                           | (0.456) | (0.038) |         | (0.977) | (0.142) |     | (0.934) | (0.725) |         | (0.879) | (0.220) |     |
| Are you planning to stop smoking within the next 30 days? | 2.049*  | 2.165*  |         | 0.210   | 1.188   |     | 2.027** | 0.344   |         | 0.319   | 1.421*  |     |
|                                                           | (0.049) | (0.018) |         | (0.727) | (0.086) |     | (0.001) | (0.622) |         | (0.570) | (0.025) |     |
| Smoked in the past 30 days                                |         |         | 0.795   |         | 2.156*  |     |         |         | -1.854* |         | -0.954  |     |
|                                                           |         |         | (0.555) |         | (0.015) |     |         |         | (0.048) |         | (0.282) |     |
| Observations                                              | 214     | 203     | 203     | 214     | 203     | 204 | 214     | 203     | 204     | 214     | 203     | 204 |

p-values in parentheses

\* p<0.05, \*\* p<0.01, \*\*\* p<0.001

**Appendix 2 table 2. Reaction and Belief Scales to Warning Statement “Tobacco Smoke Can Harm Your Children”, by Sample**

| Explanatory Variable                 | Warning 2 – Tobacco Smoke Can Harm Your Children |                     |                     |                          |                     |                     |                                                     |                     |                   |                                                            |                     |                   |
|--------------------------------------|--------------------------------------------------|---------------------|---------------------|--------------------------|---------------------|---------------------|-----------------------------------------------------|---------------------|-------------------|------------------------------------------------------------|---------------------|-------------------|
|                                      | Emotional reaction scale                         |                     |                     | Cognitive reaction scale |                     |                     | Beliefs about health risks to regular smokers scale |                     |                   | Beliefs about health risks from regular SHS exposure scale |                     |                   |
|                                      | Adult                                            | Young Adult         | Youth               | Adult                    | Young Adult         | Youth               | Adult                                               | Young Adult         | Youth             | Adult                                                      | Young Adult         | Youth             |
| <b>Graphic warning vs. text only</b> | 5.828***<br>(0.000)                              | 4.848***<br>(0.000) | 4.969***<br>(0.000) | 1.945**<br>(0.002)       | 2.920***<br>(0.000) | 2.997***<br>(0.000) | 0.132<br>(0.831)                                    | 0.497<br>(0.447)    | -0.735<br>(0.214) | -0.666<br>(0.231)                                          | -0.544<br>(0.381)   | 0.646<br>(0.249)  |
| <b>Age</b>                           | -0.035<br>(0.312)                                | 0.269<br>(0.361)    | 0.231<br>(0.479)    | 0.004<br>(0.885)         | 0.121<br>(0.521)    | 0.383<br>(0.126)    | -0.014<br>(0.620)                                   | -0.202<br>(0.304)   | -0.230<br>(0.373) | -0.051*<br>(0.030)                                         | -0.074<br>(0.716)   | 0.163<br>(0.465)  |
| <b>Gender</b>                        | 1.596<br>(0.097)                                 | 0.550<br>(0.543)    | 1.563<br>(0.079)    | 1.041<br>(0.106)         | 0.078<br>(0.909)    | 1.327*<br>(0.030)   | 1.286*<br>(0.049)                                   | 2.520***<br>(0.000) | 1.696*<br>(0.010) | 0.978<br>(0.091)                                           | 2.518***<br>(0.000) | 0.666<br>(0.263)  |
| <b>Race/ethnicity</b>                |                                                  |                     |                     |                          |                     |                     |                                                     |                     |                   |                                                            |                     |                   |
| Black/African American               | -2.337<br>(0.250)                                | -2.175<br>(0.296)   | 1.597<br>(0.507)    | -0.172<br>(0.882)        | 0.032<br>(0.989)    | 2.555<br>(0.072)    | 1.501<br>(0.378)                                    | 2.686<br>(0.137)    | 0.669<br>(0.636)  | 0.493<br>(0.653)                                           | 1.163<br>(0.626)    | 0.740<br>(0.559)  |
| Hispanic                             | 2.938<br>(0.078)                                 | 1.067<br>(0.373)    | -1.187<br>(0.380)   | 1.000<br>(0.258)         | 0.583<br>(0.518)    | -0.594<br>(0.552)   | 2.825**<br>(0.004)                                  | 0.274<br>(0.744)    | 1.280<br>(0.175)  | 2.406*<br>(0.018)                                          | 0.959<br>(0.203)    | -0.346<br>(0.700) |
| All other                            | -2.627<br>(0.132)                                | 4.498**<br>(0.002)  | -0.916<br>(0.428)   | -0.836<br>(0.313)        | 1.422<br>(0.142)    | -1.270<br>(0.112)   | -0.129<br>(0.922)                                   | 0.820<br>(0.365)    | -0.180<br>(0.829) | 0.442<br>(0.726)                                           | 1.832*<br>(0.045)   | -1.303<br>(0.092) |
| <b>College graduate or greater</b>   | 0.722<br>(0.433)                                 | -2.000<br>(0.073)   |                     | -0.067<br>(0.919)        | -0.778<br>(0.304)   |                     | 0.483<br>(0.450)                                    | -0.435<br>(0.568)   |                   | 0.442<br>(0.434)                                           | -0.361<br>(0.635)   |                   |
| <b>Income</b>                        |                                                  |                     |                     |                          |                     |                     |                                                     |                     |                   |                                                            |                     |                   |
| Between \$25,000 and \$49,999        | 1.992<br>(0.245)                                 | 2.818*<br>(0.018)   |                     | 1.116<br>(0.357)         | 1.620<br>(0.064)    |                     | -0.225<br>(0.857)                                   | 0.483<br>(0.563)    |                   | -1.337<br>(0.264)                                          | 0.653<br>(0.435)    |                   |

|                                                           |         |          |     |         |         |     |         |         |     |          |         |         |
|-----------------------------------------------------------|---------|----------|-----|---------|---------|-----|---------|---------|-----|----------|---------|---------|
| Between \$50,000 and \$74,999                             | 3.917*  | 0.498    |     | 1.267   | 1.126   |     | -0.706  | -0.175  |     | -1.370   | -0.222  |         |
|                                                           | (0.021) | (0.647)  |     | (0.276) | (0.192) |     | (0.562) | (0.840) |     | (0.248)  | (0.789) |         |
| More than \$75,000                                        | 1.981   | 2.444    |     | 1.030   | 1.087   |     | 0.287   | 1.430   |     | -0.255   | 0.933   |         |
|                                                           | (0.217) | (0.072)  |     | (0.385) | (0.320) |     | (0.806) | (0.162) |     | (0.825)  | (0.331) |         |
| Are you planning to stop smoking within the next 30 days? | 2.125*  | 3.713*** |     | 0.063   | 0.863   |     | 0.420   | 0.691   |     | 0.159    | 1.428*  |         |
|                                                           | (0.041) | (0.000)  |     | (0.931) | (0.224) |     | (0.575) | (0.316) |     | (0.812)  | (0.042) |         |
| Smoked in the past 30 days                                |         |          |     | -1.350  |         |     | 0.825   |         |     | -2.330** |         | -1.438* |
|                                                           |         |          |     | (0.164) |         |     | (0.214) |         |     | (0.001)  |         | (0.024) |
| Observations                                              | 216     | 204      | 203 | 216     | 204     | 204 | 216     | 204     | 205 | 216      | 204     | 204     |

p-values in parentheses

\* p<0.05, \*\* p<0.01, \*\*\* p<0.001

**Appendix 2 table 3. Reaction and Belief Scales to Warning Statement “Cigarettes Cause Fatal Lung Disease”, by Sample**

| Explanatory Variable                 | Warning 3 – Cigarettes Cause Fatal Lung Disease |                     |                     |                          |                     |                     |                                                     |                   |                    |                                                            |                   |                   |
|--------------------------------------|-------------------------------------------------|---------------------|---------------------|--------------------------|---------------------|---------------------|-----------------------------------------------------|-------------------|--------------------|------------------------------------------------------------|-------------------|-------------------|
|                                      | Emotional reaction scale                        |                     |                     | Cognitive reaction scale |                     |                     | Beliefs about health risks to regular smokers scale |                   |                    | Beliefs about health risks from regular SHS exposure scale |                   |                   |
|                                      | Adult                                           | Young Adult         | Youth               | Adult                    | Young Adult         | Youth               | Adult                                               | Young Adult       | Youth              | Adult                                                      | Young Adult       | Youth             |
| <b>Graphic warning vs. text only</b> | 6.576***<br>(0.000)                             | 5.167***<br>(0.000) | 4.005***<br>(0.000) | 3.533***<br>(0.000)      | 3.701***<br>(0.000) | 6.063***<br>(0.000) | 0.311<br>(0.626)                                    | -0.662<br>(0.269) | -0.717<br>(0.224)  | -0.833<br>(0.115)                                          | -0.366<br>(0.504) | -0.278<br>(0.618) |
| <b>Age</b>                           | -0.044<br>(0.226)                               | 0.234<br>(0.356)    | 0.248<br>(0.517)    | 0.044<br>(0.071)         | 0.313*<br>(0.037)   | -0.020<br>(0.927)   | -0.027<br>(0.295)                                   | 0.071<br>(0.710)  | -0.281<br>(0.242)  | -0.053*<br>(0.026)                                         | -0.032<br>(0.859) | -0.174<br>(0.488) |
| <b>Gender</b>                        | 2.060*<br>(0.029)                               | -0.122<br>(0.890)   | -0.396<br>(0.667)   | 1.075<br>(0.085)         | 0.280<br>(0.625)    | -0.166<br>(0.766)   | 1.555*<br>(0.015)                                   | 0.950<br>(0.140)  | 0.112<br>(0.852)   | 2.076***<br>(0.000)                                        | 0.554<br>(0.345)  | 1.434*<br>(0.013) |
| <b>Race/ethnicity</b>                |                                                 |                     |                     |                          |                     |                     |                                                     |                   |                    |                                                            |                   |                   |
| Black/African American               | -0.291<br>(0.894)                               | 1.086<br>(0.723)    | 1.598<br>(0.388)    | 1.647<br>(0.272)         | 0.647<br>(0.714)    | -1.384<br>(0.279)   | -0.569<br>(0.707)                                   | 0.440<br>(0.813)  | 0.175<br>(0.902)   | 0.355<br>(0.793)                                           | 3.414<br>(0.063)  | 1.786<br>(0.115)  |
| Hispanic                             | 0.387<br>(0.772)                                | 2.985*<br>(0.016)   | 0.839<br>(0.610)    | -0.865<br>(0.370)        | 0.745<br>(0.318)    | 0.342<br>(0.752)    | -1.685<br>(0.139)                                   | -0.975<br>(0.228) | 2.241**<br>(0.004) | 0.249<br>(0.808)                                           | 0.431<br>(0.553)  | 2.273*<br>(0.018) |
| All other                            | 0.043<br>(0.978)                                | 2.238<br>(0.104)    | 1.456<br>(0.309)    | -0.085<br>(0.929)        | 1.266<br>(0.128)    | -1.322<br>(0.150)   | -1.020<br>(0.316)                                   | 0.595<br>(0.534)  | 1.627<br>(0.077)   | 0.877<br>(0.271)                                           | 0.753<br>(0.479)  | 1.282<br>(0.230)  |
| <b>College graduate or greater</b>   | -0.250<br>(0.809)                               | 0.415<br>(0.695)    |                     | -0.212<br>(0.750)        | 0.226<br>(0.721)    |                     | -0.402<br>(0.569)                                   | 0.427<br>(0.550)  |                    | -0.547<br>(0.349)                                          | -0.314<br>(0.631) |                   |
| <b>Income</b>                        |                                                 |                     |                     |                          |                     |                     |                                                     |                   |                    |                                                            |                   |                   |
| Between \$25,000 and \$49,999        | 0.343<br>(0.818)                                | -0.476<br>(0.654)   |                     | 0.543<br>(0.580)         | 0.507<br>(0.450)    |                     | 0.717<br>(0.491)                                    | -0.781<br>(0.254) |                    | -0.067<br>(0.940)                                          | -0.704<br>(0.292) |                   |



|                                                                  |                    |                    |                   |                   |                  |                   |                     |                   |                     |                     |                   |                    |
|------------------------------------------------------------------|--------------------|--------------------|-------------------|-------------------|------------------|-------------------|---------------------|-------------------|---------------------|---------------------|-------------------|--------------------|
| Between \$50,000 and \$74,999                                    | 2.838<br>(0.054)   | 0.768<br>(0.542)   |                   | 1.807<br>(0.069)  | 0.582<br>(0.487) |                   | -0.328<br>(0.754)   | -0.135<br>(0.885) |                     | 0.451<br>(0.588)    | 0.680<br>(0.385)  |                    |
| More than \$75,000                                               | 2.384<br>(0.113)   | 0.208<br>(0.874)   |                   | 0.475<br>(0.650)  | 1.046<br>(0.187) |                   | 0.562<br>(0.598)    | -0.347<br>(0.733) |                     | 0.159<br>(0.863)    | -0.012<br>(0.990) |                    |
| <b>Are you planning to stop smoking within the next 30 days?</b> | 3.204**<br>(0.009) | 2.807**<br>(0.002) |                   | 1.557*<br>(0.018) | 0.487<br>(0.419) |                   | 3.002***<br>(0.000) | -0.831<br>(0.182) |                     | 2.424***<br>(0.000) | -0.560<br>(0.356) |                    |
| <b>Smoked in the past 30 days</b>                                |                    |                    | -0.467<br>(0.646) |                   |                  | -0.254<br>(0.722) |                     |                   | -2.476**<br>(0.003) |                     |                   | -1.549*<br>(0.025) |
| <b>Observations</b>                                              | 218                | 205                | 204               | 218               | 206              | 204               | 218                 | 205               | 204                 | 218                 | 206               | 204                |

p-values in parentheses

\* p<0.05, \*\* p<0.01, \*\*\* p<0.001

**Appendix 2 table 4. Reaction and Belief Scales to Warning Statement “Cigarettes Cause Cancer”, by Sample**

| Explanatory Variable                 | Warning 4 – Cigarettes Cause Cancer |                     |                     |                          |                     |                     |                                                     |                     |                   |                                                            |                   |                   |
|--------------------------------------|-------------------------------------|---------------------|---------------------|--------------------------|---------------------|---------------------|-----------------------------------------------------|---------------------|-------------------|------------------------------------------------------------|-------------------|-------------------|
|                                      | Emotional reaction scale            |                     |                     | Cognitive reaction scale |                     |                     | Beliefs about health risks to regular smokers scale |                     |                   | Beliefs about health risks from regular SHS exposure scale |                   |                   |
|                                      | Adult                               | Young Adult         | Youth               | Adult                    | Young Adult         | Youth               | Adult                                               | Young Adult         | Youth             | Adult                                                      | Young Adult       | Youth             |
| <b>Graphic warning vs. text only</b> | 8.065***<br>(0.000)                 | 8.613***<br>(0.000) | 7.611***<br>(0.000) | 3.537***<br>(0.000)      | 3.919***<br>(0.000) | 6.517***<br>(0.000) | 0.290<br>(0.612)                                    | -0.788<br>(0.173)   | 0.114<br>(0.843)  | -0.309<br>(0.580)                                          | -0.677<br>(0.203) | 0.467<br>(0.405)  |
| <b>Age</b>                           | -0.057<br>(0.115)                   | 0.110<br>(0.701)    | 0.064<br>(0.844)    | -0.015<br>(0.560)        | -0.201<br>(0.296)   | -0.077<br>(0.732)   | -0.051*<br>(0.027)                                  | -0.139<br>(0.453)   | -0.008<br>(0.972) | -0.089***<br>(0.001)                                       | 0.051<br>(0.779)  | 0.216<br>(0.332)  |
| <b>Gender</b>                        | 1.241<br>(0.154)                    | -0.682<br>(0.452)   | 1.583<br>(0.066)    | -0.824<br>(0.155)        | 1.202*<br>(0.042)   | -0.354<br>(0.527)   | 1.160<br>(0.060)                                    | 2.005***<br>(0.001) | 1.298*<br>(0.028) | 1.027<br>(0.093)                                           | 1.368*<br>(0.013) | 0.414<br>(0.476)  |
| <b>Race/ethnicity</b>                |                                     |                     |                     |                          |                     |                     |                                                     |                     |                   |                                                            |                   |                   |
| Black/African American               | -1.140<br>(0.466)                   | -1.503<br>(0.724)   | 2.939<br>(0.163)    | -0.681<br>(0.495)        | 1.282<br>(0.519)    | 1.509<br>(0.218)    | -1.337<br>(0.142)                                   | 0.856<br>(0.682)    | 1.287<br>(0.232)  | 0.518<br>(0.535)                                           | -1.538<br>(0.382) | 2.422*<br>(0.042) |
| Hispanic                             | 0.441<br>(0.821)                    | 3.097*<br>(0.020)   | 1.708<br>(0.249)    | 1.377<br>(0.215)         | 0.516<br>(0.535)    | 0.109<br>(0.905)    | -0.236<br>(0.846)                                   | -0.427<br>(0.615)   | 0.827<br>(0.247)  | 0.383<br>(0.741)                                           | 0.058<br>(0.938)  | 0.530<br>(0.541)  |
| All other                            | -1.628<br>(0.312)                   | 0.125<br>(0.915)    | 1.671<br>(0.197)    | -1.879<br>(0.066)        | 0.615<br>(0.349)    | -0.665<br>(0.521)   | -0.525<br>(0.655)                                   | 0.932<br>(0.258)    | -0.440<br>(0.722) | -1.045<br>(0.316)                                          | 1.710*<br>(0.026) | 0.057<br>(0.958)  |
| <b>College graduate or greater</b>   | -0.999<br>(0.256)                   | -0.533<br>(0.607)   |                     | 0.164<br>(0.778)         | 0.104<br>(0.878)    |                     | 0.600<br>(0.331)                                    | -0.717<br>(0.296)   |                   | -0.011<br>(0.984)                                          | -0.857<br>(0.189) |                   |
| <b>Income</b>                        |                                     |                     |                     |                          |                     |                     |                                                     |                     |                   |                                                            |                   |                   |
| Between \$25,000 and \$49,999        | 0.636<br>(0.716)                    | 0.882<br>(0.434)    |                     | 1.253<br>(0.253)         | -0.852<br>(0.250)   |                     | -1.255<br>(0.289)                                   | 0.433<br>(0.570)    |                   | 0.519<br>(0.602)                                           | 0.615<br>(0.361)  |                   |

|                                                           |                  |                    |     |                   |                  |     |                   |                   |     |                   |                  |                   |
|-----------------------------------------------------------|------------------|--------------------|-----|-------------------|------------------|-----|-------------------|-------------------|-----|-------------------|------------------|-------------------|
| Between \$50,000 and \$74,999                             | 2.684<br>(0.130) | 3.621**<br>(0.006) |     | 2.373*<br>(0.034) | 1.525<br>(0.094) |     | -0.582<br>(0.627) | 2.079*<br>(0.022) |     | 0.745<br>(0.456)  | 1.521<br>(0.082) |                   |
| More than \$75,000                                        | 3.240<br>(0.060) | 2.900*<br>(0.025)  |     | 1.433<br>(0.169)  | 1.036<br>(0.220) |     | -1.374<br>(0.227) | 1.416<br>(0.106)  |     | -0.141<br>(0.878) | 0.585<br>(0.488) |                   |
| Are you planning to stop smoking within the next 30 days? | 2.815**          | 1.888              |     | 0.303             | 0.232            |     | 1.881**           | 0.031             |     | 1.500*            | 0.865            |                   |
|                                                           | (0.010)          | (0.059)            |     | (0.682)           | (0.714)          |     | (0.008)           | (0.961)           |     | (0.026)           | (0.148)          |                   |
| Smoked in the past 30 days                                |                  |                    |     | 2.984*<br>(0.016) |                  |     | 0.060<br>(0.933)  |                   |     | -0.494<br>(0.518) |                  | -0.687<br>(0.351) |
| Observations                                              | 217              | 203                | 205 | 218               | 203              | 205 | 218               | 203               | 205 | 218               | 203              | 205               |

p-values in parentheses

\* p<0.05, \*\* p<0.01, \*\*\* p<0.001

**Appendix 2 table 5. Reaction and Belief Scales to Warning Statement “Cigarettes Cause Strokes and Heart Disease”, by Sample**

| Explanatory Variable                 | Warning 5 – Cigarettes Cause Strokes and Heart Disease |                     |                     |                          |                     |                     |                                                     |                   |                    |                                                            |                   |                    |
|--------------------------------------|--------------------------------------------------------|---------------------|---------------------|--------------------------|---------------------|---------------------|-----------------------------------------------------|-------------------|--------------------|------------------------------------------------------------|-------------------|--------------------|
|                                      | Emotional reaction scale                               |                     |                     | Cognitive reaction scale |                     |                     | Beliefs about health risks to regular smokers scale |                   |                    | Beliefs about health risks from regular SHS exposure scale |                   |                    |
|                                      | Adult                                                  | Young Adult         | Youth               | Adult                    | Young Adult         | Youth               | Adult                                               | Young Adult       | Youth              | Adult                                                      | Young Adult       | Youth              |
| <b>Graphic warning vs. text only</b> | 6.393***<br>(0.000)                                    | 6.270***<br>(0.000) | 7.036***<br>(0.000) | 2.343***<br>(0.000)      | 3.142***<br>(0.000) | 5.444***<br>(0.000) | -0.022<br>(0.971)                                   | 0.667<br>(0.306)  | 0.480<br>(0.401)   | -0.406<br>(0.443)                                          | 0.891<br>(0.141)  | 0.917<br>(0.101)   |
| <b>Age</b>                           | -0.012<br>(0.694)                                      | -0.114<br>(0.697)   | 0.453<br>(0.165)    | -0.003<br>(0.913)        | -0.122<br>(0.553)   | 0.310<br>(0.169)    | 0.002<br>(0.951)                                    | 0.347<br>(0.111)  | 0.186<br>(0.449)   | -0.053*<br>(0.016)                                         | -0.135<br>(0.474) | 0.320<br>(0.181)   |
| <b>Gender</b>                        | 1.801*<br>(0.029)                                      | 0.467<br>(0.617)    | 2.120**<br>(0.008)  | 0.030<br>(0.959)         | 0.048<br>(0.939)    | 0.243<br>(0.677)    | 1.115<br>(0.071)                                    | -0.557<br>(0.411) | 1.921**<br>(0.002) | 1.731**<br>(0.002)                                         | 1.103<br>(0.082)  | 1.652**<br>(0.006) |
| <b>Race/ethnicity</b>                |                                                        |                     |                     |                          |                     |                     |                                                     |                   |                    |                                                            |                   |                    |
| Black/African American               | 1.525<br>(0.415)                                       | 1.977<br>(0.533)    | 1.375<br>(0.329)    | 1.125<br>(0.398)         | 1.761<br>(0.305)    | 1.817<br>(0.146)    | 1.214<br>(0.337)                                    | -2.573<br>(0.178) | -0.118<br>(0.927)  | 1.201<br>(0.348)                                           | 2.511<br>(0.187)  | -0.414<br>(0.671)  |
| Hispanic                             | -2.552<br>(0.080)                                      | 1.656<br>(0.242)    | 3.985**<br>(0.010)  | 0.712<br>(0.484)         | 0.717<br>(0.455)    | 1.742*<br>(0.027)   | 2.711*<br>(0.023)                                   | -1.217<br>(0.206) | 0.808<br>(0.420)   | 3.077*<br>(0.022)                                          | -1.253<br>(0.162) | 0.895<br>(0.426)   |
| All other                            | 2.920<br>(0.066)                                       | 0.081<br>(0.950)    | -1.551<br>(0.168)   | 2.901<br>(0.051)         | 0.088<br>(0.910)    | -0.134<br>(0.876)   | 0.940<br>(0.560)                                    | -0.121<br>(0.910) | 0.308<br>(0.702)   | 0.794<br>(0.598)                                           | -0.054<br>(0.946) | -0.172<br>(0.836)  |
| <b>College graduate or greater</b>   | 0.640<br>(0.469)                                       | 0.942<br>(0.412)    |                     | -0.010<br>(0.987)        | 0.346<br>(0.673)    |                     | -0.296<br>(0.630)                                   | -0.626<br>(0.432) |                    | 0.032<br>(0.957)                                           | 0.379<br>(0.634)  |                    |
| <b>Income</b>                        |                                                        |                     |                     |                          |                     |                     |                                                     |                   |                    |                                                            |                   |                    |
| Between \$25,000 and \$49,999        | 3.382**                                                | 0.871               |                     | 0.798                    | -0.234              |                     | -0.424                                              | -0.507            |                    | 1.260                                                      | -0.322            |                    |

|                                                           |          |         |         |         |         |     |         |           |     |         |          |     |
|-----------------------------------------------------------|----------|---------|---------|---------|---------|-----|---------|-----------|-----|---------|----------|-----|
|                                                           | (0.007)  | (0.447) |         | (0.352) | (0.770) |     | (0.702) | (0.551)   |     | (0.194) | (0.678)  |     |
| Between \$50,000 and \$74,999                             | 2.570*   | -0.069  |         | -0.716  | 0.896   |     | -0.533  | -1.901*   |     | 0.791   | -1.419   |     |
|                                                           | (0.032)  | (0.954) |         | (0.437) | (0.304) |     | (0.598) | (0.031)   |     | (0.418) | (0.100)  |     |
| More than \$75,000                                        | 2.977*   | 2.227   |         | 0.341   | 1.528   |     | -1.427  | 0.981     |     | 0.065   | 0.637    |     |
|                                                           | (0.013)  | (0.210) |         | (0.725) | (0.145) |     | (0.174) | (0.342)   |     | (0.946) | (0.547)  |     |
| Are you planning to stop smoking within the next 30 days? | 5.628*** | 2.654*  |         | 0.153   | 0.456   |     | 0.999   | 1.586*    |     | 1.648*  | 1.796*   |     |
|                                                           | (0.000)  | (0.016) |         | (0.830) | (0.538) |     | (0.188) | (0.020)   |     | (0.011) | (0.015)  |     |
| Smoked in the past 30 days                                |          |         | -0.265  |         | 0.980   |     |         | -3.590*** |     |         | -2.241** |     |
|                                                           |          |         | (0.802) |         | (0.148) |     |         | (0.000)   |     |         | (0.001)  |     |
| Observations                                              | 215      | 203     | 204     | 215     | 203     | 204 | 215     | 203       | 204 | 215     | 202      | 204 |

p-values in parentheses

\* p<0.05, \*\* p<0.01, \*\*\* p<0.001

**Appendix 2 table 6. Reaction and Belief Scales to Warning Statement “Smoking During Pregnancy Can Harm Your Baby”, by Sample**

| Explanatory Variable                 | Warning 6 – Smoking During Pregnancy Can Harm Your Baby |                     |                     |                          |                     |                     |                                                     |                    |                    |                                                            |                     |                   |
|--------------------------------------|---------------------------------------------------------|---------------------|---------------------|--------------------------|---------------------|---------------------|-----------------------------------------------------|--------------------|--------------------|------------------------------------------------------------|---------------------|-------------------|
|                                      | Emotional reaction scale                                |                     |                     | Cognitive reaction scale |                     |                     | Beliefs about health risks to regular smokers scale |                    |                    | Beliefs about health risks from regular SHS exposure scale |                     |                   |
|                                      | Adult                                                   | Young Adult         | Youth               | Adult                    | Young Adult         | Youth               | Adult                                               | Young Adult        | Youth              | Adult                                                      | Young Adult         | Youth             |
| <b>Graphic warning vs. text only</b> | 6.709***<br>(0.000)                                     | 6.605***<br>(0.000) | 5.598***<br>(0.000) | 2.359***<br>(0.000)      | 3.417***<br>(0.000) | 5.565***<br>(0.000) | 1.600**<br>(0.007)                                  | -0.491<br>(0.426)  | -1.400*<br>(0.032) | 0.660<br>(0.201)                                           | -0.372<br>(0.502)   | -0.688<br>(0.227) |
| <b>Age</b>                           | -0.064*<br>(0.024)                                      | -0.236<br>(0.356)   | 0.468<br>(0.159)    | 0.010<br>(0.659)         | 0.055<br>(0.775)    | 0.092<br>(0.712)    | -0.038<br>(0.109)                                   | -0.128<br>(0.501)  | 0.282<br>(0.288)   | -0.023<br>(0.293)                                          | 0.167<br>(0.344)    | 0.419<br>(0.078)  |
| <b>Gender</b>                        | -0.037<br>(0.962)                                       | 0.802<br>(0.407)    | 1.680<br>(0.069)    | 0.694<br>(0.307)         | -1.065<br>(0.078)   | 0.586<br>(0.317)    | 0.605<br>(0.325)                                    | 2.000**<br>(0.002) | 1.161<br>(0.059)   | 1.581**<br>(0.004)                                         | 1.441*<br>(0.016)   | 0.815<br>(0.153)  |
| <b>Race/ethnicity</b>                |                                                         |                     |                     |                          |                     |                     |                                                     |                    |                    |                                                            |                     |                   |
| Black/African American               | 0.702<br>(0.398)                                        | -2.290<br>(0.181)   | -2.460<br>(0.072)   | -0.252<br>(0.871)        | 3.200*<br>(0.030)   | -1.398<br>(0.277)   | -0.184<br>(0.888)                                   | 2.858<br>(0.123)   | -0.232<br>(0.797)  | 0.333<br>(0.709)                                           | 6.991***<br>(0.000) | 1.191<br>(0.419)  |
| Hispanic                             | -0.662<br>(0.675)                                       | 0.712<br>(0.623)    | -1.207<br>(0.429)   | 1.798<br>(0.085)         | 0.048<br>(0.957)    | -0.550<br>(0.584)   | 0.257<br>(0.814)                                    | -1.461<br>(0.109)  | -1.588<br>(0.177)  | 0.600<br>(0.598)                                           | -1.545*<br>(0.016)  | -0.920<br>(0.362) |
| All other                            | 1.976<br>(0.302)                                        | 0.898<br>(0.475)    | -1.466<br>(0.235)   | -0.150<br>(0.907)        | 0.932<br>(0.234)    | -1.640*<br>(0.033)  | 0.832<br>(0.443)                                    | -1.673*<br>(0.039) | -1.092<br>(0.135)  | 2.142**<br>(0.005)                                         | -0.143<br>(0.864)   | -0.598<br>(0.399) |
| <b>College graduate or greater</b>   | -1.108<br>(0.159)                                       | -0.620<br>(0.542)   |                     | -0.665<br>(0.305)        | -1.253<br>(0.078)   |                     | -0.905<br>(0.114)                                   | -0.059<br>(0.935)  |                    | -0.614<br>(0.263)                                          | -0.745<br>(0.259)   |                   |
| <b>Income</b>                        |                                                         |                     |                     |                          |                     |                     |                                                     |                    |                    |                                                            |                     |                   |
| Between \$25,000 and \$49,999        | 2.485                                                   | -0.001              |                     | -1.452                   | 0.999               |                     | 0.955                                               | -0.536             |                    | 2.273*                                                     | -1.134              |                   |

|                                                           |          |         |         |         |         |         |          |         |
|-----------------------------------------------------------|----------|---------|---------|---------|---------|---------|----------|---------|
|                                                           | (0.091)  | (0.999) | (0.241) | (0.155) | (0.413) | (0.496) | (0.037)  | (0.096) |
| Between \$50,000 and \$74,999                             | 2.795    | -0.969  | -1.599  | 0.014   | 0.807   | 1.029   | 0.865    | -0.831  |
|                                                           | (0.056)  | (0.561) | (0.191) | (0.989) | (0.485) | (0.243) | (0.431)  | (0.341) |
| More than \$75,000                                        | 3.387*   | -1.952  | -1.644  | -0.158  | -0.528  | -0.757  | -0.432   | -1.231  |
|                                                           | (0.019)  | (0.112) | (0.152) | (0.850) | (0.622) | (0.395) | (0.676)  | (0.158) |
| Are you planning to stop smoking within the next 30 days? | 3.720*** | 2.887** | 0.271   | 0.546   | 2.072** | 0.799   | 1.782**  | 0.330   |
|                                                           | (0.000)  | (0.005) | (0.721) | (0.415) | (0.004) | (0.262) | (0.004)  | (0.593) |
| Smoked in the past 30 days                                |          |         | 0.521   |         | 1.034   |         | -2.448** |         |
|                                                           |          |         | (0.654) |         | (0.111) |         | (0.004)  |         |
|                                                           |          |         |         |         |         |         |          | -1.608* |
|                                                           |          |         |         |         |         |         |          | (0.025) |
| Observations                                              | 215      | 202     | 204     | 215     | 202     | 204     | 215      | 202     |
|                                                           |          |         |         |         |         |         | 204      | 215     |
|                                                           |          |         |         |         |         |         | 202      | 204     |

p-values in parentheses

\* p<0.05, \*\* p<0.01, \*\*\* p<0.001

**Appendix 2 table 7. Reaction and Belief Scales to Warning Statement “Smoking Can Kill You”, by Sample**

| Explanatory Variable                 | Warning 7 – Smoking Can Kill You |                     |                     |                          |                     |                     |                                                     |                   |                    |                                                            |                   |                   |
|--------------------------------------|----------------------------------|---------------------|---------------------|--------------------------|---------------------|---------------------|-----------------------------------------------------|-------------------|--------------------|------------------------------------------------------------|-------------------|-------------------|
|                                      | Emotional reaction scale         |                     |                     | Cognitive reaction scale |                     |                     | Beliefs about health risks to regular smokers scale |                   |                    | Beliefs about health risks from regular SHS exposure scale |                   |                   |
|                                      | Adult                            | Young Adult         | Youth               | Adult                    | Young Adult         | Youth               | Adult                                               | Young Adult       | Youth              | Adult                                                      | Young Adult       | Youth             |
| <b>Graphic warning vs. text only</b> | 7.698***<br>(0.000)              | 5.569***<br>(0.000) | 5.549***<br>(0.000) | 2.997***<br>(0.000)      | 3.313***<br>(0.000) | 4.336***<br>(0.000) | 0.798<br>(0.193)                                    | 0.307<br>(0.608)  | 1.190<br>(0.052)   | 0.259<br>(0.653)                                           | -0.299<br>(0.610) | 0.440<br>(0.450)  |
| <b>Age</b>                           | -0.040<br>(0.257)                | 0.420<br>(0.162)    | 0.142<br>(0.673)    | -0.013<br>(0.660)        | 0.042<br>(0.822)    | 0.121<br>(0.603)    | -0.069**<br>(0.008)                                 | -0.035<br>(0.856) | 0.188<br>(0.466)   | -0.103***<br>(0.000)                                       | 0.148<br>(0.435)  | 0.329<br>(0.193)  |
| <b>Gender</b>                        | 2.727***<br>(0.001)              | 0.282<br>(0.769)    | 0.173<br>(0.846)    | 0.693<br>(0.271)         | 0.859<br>(0.161)    | -0.419<br>(0.482)   | 0.612<br>(0.331)                                    | 1.137<br>(0.061)  | 2.092**<br>(0.001) | 0.616<br>(0.297)                                           | 1.153<br>(0.053)  | 1.116<br>(0.052)  |
| <b>Race/ethnicity</b>                |                                  |                     |                     |                          |                     |                     |                                                     |                   |                    |                                                            |                   |                   |
| Black/African American               | 0.461<br>(0.859)                 | -5.672<br>(0.077)   | -0.742<br>(0.535)   | 1.219<br>(0.518)         | 2.904***<br>(0.001) | 0.617<br>(0.541)    | 0.043<br>(0.977)                                    | -4.646<br>(0.378) | 2.446*<br>(0.012)  | 2.638*<br>(0.029)                                          | 5.052<br>(0.077)  | 2.646*<br>(0.012) |
| Hispanic                             | 0.345<br>(0.780)                 | -1.207<br>(0.301)   | 1.510<br>(0.260)    | -0.802<br>(0.568)        | -0.832<br>(0.265)   | 0.863<br>(0.348)    | 0.076<br>(0.953)                                    | -0.672<br>(0.405) | -0.500<br>(0.576)  | 0.485<br>(0.720)                                           | -0.282<br>(0.725) | 0.708<br>(0.397)  |
| All other                            | -0.197<br>(0.934)                | -0.101<br>(0.937)   | 1.578<br>(0.256)    | -0.090<br>(0.944)        | -0.641<br>(0.451)   | 0.120<br>(0.891)    | -2.665<br>(0.065)                                   | 0.508<br>(0.513)  | -1.807<br>(0.073)  | -1.919<br>(0.083)                                          | 0.784<br>(0.251)  | 0.241<br>(0.767)  |
| <b>College graduate or greater</b>   | -0.191<br>(0.825)                | -2.053<br>(0.082)   |                     | 0.905<br>(0.162)         | -1.246<br>(0.089)   |                     | 0.057<br>(0.929)                                    | -0.190<br>(0.796) |                    | 0.618<br>(0.270)                                           | -0.942<br>(0.216) |                   |
| <b>Income</b>                        |                                  |                     |                     |                          |                     |                     |                                                     |                   |                    |                                                            |                   |                   |
| Between \$25,000 and \$49,999        | 1.354<br>(0.370)                 | -0.443<br>(0.701)   |                     | 1.725<br>(0.151)         | 0.463<br>(0.522)    |                     | 1.330<br>(0.252)                                    | -0.195<br>(0.786) |                    | 0.916<br>(0.425)                                           | 0.934<br>(0.212)  |                   |



|                                                           |                   |                     |     |                   |                  |                   |                   |                   |                      |                   |                      |     |
|-----------------------------------------------------------|-------------------|---------------------|-----|-------------------|------------------|-------------------|-------------------|-------------------|----------------------|-------------------|----------------------|-----|
| Between \$50,000 and \$74,999                             | 0.913<br>(0.547)  | 1.901<br>(0.230)    |     | 0.695<br>(0.554)  | 0.758<br>(0.465) |                   | 1.491<br>(0.165)  | -1.206<br>(0.214) |                      | 0.383<br>(0.721)  | -0.553<br>(0.543)    |     |
| More than \$75,000                                        | 1.373<br>(0.364)  | -0.251<br>(0.864)   |     | 1.265<br>(0.288)  | 0.053<br>(0.954) |                   | 1.013<br>(0.352)  | -0.855<br>(0.297) |                      | -0.021<br>(0.983) | -0.563<br>(0.478)    |     |
| Are you planning to stop smoking within the next 30 days? | 2.437*<br>(0.015) | 3.682***<br>(0.000) |     | 1.124<br>(0.127)  | 0.673<br>(0.320) |                   | 1.518*<br>(0.031) | 1.550*<br>(0.021) |                      | 0.624<br>(0.398)  | 0.771<br>(0.227)     |     |
| Smoked in the past 30 days                                |                   |                     |     | -1.337<br>(0.221) |                  | -0.747<br>(0.349) |                   |                   | -3.243***<br>(0.000) |                   | -2.318***<br>(0.000) |     |
| Observations                                              | 215               | 204                 | 204 | 215               | 204              | 204               | 216               | 204               | 204                  | 216               | 204                  | 204 |

p-values in parentheses

\* p<0.05, \*\* p<0.01, \*\*\* p<0.001

**Appendix 2 table 8. Reaction and Belief Scales to Warning Statement “Tobacco Smoke Causes Fatal Lung Disease in Nonsmokers”, by Sample**

| Explanatory Variable                 | Warning 8 – Tobacco Smoke Causes Fatal Lung Disease in Nonsmokers |                     |                     |                          |                     |                     |                                                     |                   |                   |                                                            |                   |                   |
|--------------------------------------|-------------------------------------------------------------------|---------------------|---------------------|--------------------------|---------------------|---------------------|-----------------------------------------------------|-------------------|-------------------|------------------------------------------------------------|-------------------|-------------------|
|                                      | Emotional reaction scale                                          |                     |                     | Cognitive reaction scale |                     |                     | Beliefs about health risks to regular smokers scale |                   |                   | Beliefs about health risks from regular SHS exposure scale |                   |                   |
|                                      | Adult                                                             | Young Adult         | Youth               | Adult                    | Young Adult         | Youth               | Adult                                               | Young Adult       | Youth             | Adult                                                      | Young Adult       | Youth             |
| <b>Graphic warning vs. text only</b> | 4.701***<br>(0.000)                                               | 5.438***<br>(0.000) | 5.128***<br>(0.000) | 1.436*<br>(0.011)        | 2.537***<br>(0.000) | 3.891***<br>(0.000) | 0.286<br>(0.629)                                    | 1.292*<br>(0.037) | 0.453<br>(0.467)  | 0.912<br>(0.097)                                           | 0.184<br>(0.742)  | 0.770<br>(0.209)  |
| <b>Age</b>                           | -0.086*<br>(0.017)                                                | -0.335<br>(0.251)   | 0.189<br>(0.602)    | 0.014<br>(0.517)         | 0.097<br>(0.608)    | 0.041<br>(0.890)    | -0.054*<br>(0.019)                                  | -0.080<br>(0.697) | -0.213<br>(0.414) | -0.091***<br>(0.000)                                       | -0.025<br>(0.893) | 0.011<br>(0.966)  |
| <b>Gender</b>                        | 1.005<br>(0.280)                                                  | 1.719<br>(0.064)    | 2.211*<br>(0.022)   | 0.500<br>(0.413)         | 0.684<br>(0.263)    | 0.734<br>(0.271)    | -0.383<br>(0.500)                                   | 1.448*<br>(0.021) | 1.131<br>(0.059)  | 0.796<br>(0.162)                                           | 1.106<br>(0.055)  | 1.090<br>(0.076)  |
| <b>Race/ethnicity</b>                |                                                                   |                     |                     |                          |                     |                     |                                                     |                   |                   |                                                            |                   |                   |
| Black/African American               | -0.433<br>(0.823)                                                 | 3.669<br>(0.208)    | -2.801<br>(0.081)   | 0.633<br>(0.649)         | 2.803<br>(0.165)    | 1.370<br>(0.311)    | 1.035<br>(0.463)                                    | 1.361<br>(0.312)  | -0.413<br>(0.778) | 1.050<br>(0.281)                                           | 0.630<br>(0.669)  | 0.744<br>(0.562)  |
| Hispanic                             | 2.267<br>(0.305)                                                  | 1.479<br>(0.240)    | 1.621<br>(0.245)    | 0.563<br>(0.594)         | 3.232***<br>(0.000) | 0.394<br>(0.668)    | 1.299<br>(0.247)                                    | 0.316<br>(0.732)  | -0.048<br>(0.956) | 1.871<br>(0.071)                                           | 0.139<br>(0.867)  | 0.993<br>(0.208)  |
| All other                            | 0.558<br>(0.756)                                                  | 2.504<br>(0.058)    | 1.204<br>(0.528)    | -0.037<br>(0.978)        | -0.900<br>(0.285)   | 0.687<br>(0.495)    | -0.270<br>(0.868)                                   | -0.404<br>(0.644) | -0.996<br>(0.419) | 0.641<br>(0.362)                                           | -0.429<br>(0.563) | -0.689<br>(0.561) |
| <b>College graduate or greater</b>   | -0.782<br>(0.383)                                                 | 1.663<br>(0.146)    |                     | -1.329*<br>(0.017)       | -0.105<br>(0.869)   |                     | -0.593<br>(0.327)                                   | 1.009<br>(0.194)  |                   | -0.822<br>(0.181)                                          | 0.743<br>(0.285)  |                   |
| <b>Income</b>                        |                                                                   |                     |                     |                          |                     |                     |                                                     |                   |                   |                                                            |                   |                   |
| Between \$25,000 and \$49,999        | 0.323                                                             | 0.174               |                     | -3.088***                | -1.183              |                     | 0.581                                               | -0.811            |                   | -1.123                                                     | -0.157            |                   |

|                                                           |         |         |          |         |         |         |         |         |
|-----------------------------------------------------------|---------|---------|----------|---------|---------|---------|---------|---------|
|                                                           | (0.838) | (0.885) | (0.001)  | (0.110) | (0.641) | (0.286) | (0.284) | (0.819) |
| Between \$50,000 and \$74,999                             | 1.289   | 0.999   | -2.829** | -0.835  | -0.072  | -0.635  | -0.844  | -0.694  |
|                                                           | (0.390) | (0.468) | (0.003)  | (0.409) | (0.953) | (0.520) | (0.429) | (0.420) |
| More than \$75,000                                        | 1.685   | -0.405  | -2.527** | -0.205  | -0.393  | -1.124  | -1.098  | -1.587  |
|                                                           | (0.247) | (0.763) | (0.004)  | (0.801) | (0.738) | (0.177) | (0.329) | (0.060) |
| Are you planning to stop smoking within the next 30 days? | 2.898** | 3.105** | 1.444*   | 0.928   | 1.911*  | 0.333   | 1.574*  | 0.733   |
|                                                           | (0.006) | (0.005) | (0.018)  | (0.165) | (0.010) | (0.610) | (0.012) | (0.204) |
| Smoked in the past 30 days                                |         |         | 0.892    |         | 0.362   |         | -0.762  |         |
|                                                           |         |         | (0.489)  |         | (0.654) |         | (0.405) | -0.384  |
|                                                           |         |         |          |         |         |         |         | (0.644) |
| Observations                                              | 217     | 207     | 205      | 217     | 207     | 206     | 217     | 207     |
|                                                           |         |         |          |         |         |         | 206     | 217     |
|                                                           |         |         |          |         |         |         |         | 207     |
|                                                           |         |         |          |         |         |         |         | 206     |

p-values in parentheses

\* p<0.05, \*\* p<0.01, \*\*\* p<0.001

**Appendix 2 table 9. Reaction and Belief Scales to Warning Statement “Quitting Smoking Now Greatly Reduces Serious Risk to Your Health”, by Sample**

| Explanatory Variable                 | Warning 9 – Quitting Smoking Now Greatly Reduces Serious Risk to Your Health |             |         |                          |             |          |                                                     |             |         |                                                            |             |         |
|--------------------------------------|------------------------------------------------------------------------------|-------------|---------|--------------------------|-------------|----------|-----------------------------------------------------|-------------|---------|------------------------------------------------------------|-------------|---------|
|                                      | Emotional reaction scale                                                     |             |         | Cognitive reaction scale |             |          | Beliefs about health risks to regular smokers scale |             |         | Beliefs about health risks from regular SHS exposure scale |             |         |
|                                      | Adult                                                                        | Young Adult | Youth   | Adult                    | Young Adult | Youth    | Adult                                               | Young Adult | Youth   | Adult                                                      | Young Adult | Youth   |
| <b>Graphic warning vs. text only</b> | 1.502*                                                                       | 1.748*      | 0.174   | 1.263*                   | 1.656*      | 2.209*** | 0.412                                               | 1.008       | -0.534  | 0.136                                                      | 0.387       | -0.118  |
|                                      | (0.035)                                                                      | (0.034)     | (0.820) | (0.038)                  | (0.013)     | (0.000)  | (0.485)                                             | (0.096)     | (0.371) | (0.794)                                                    | (0.528)     | (0.835) |
| <b>Age</b>                           | -0.043                                                                       | -0.328      | -0.163  | -0.010                   | 0.155       | 0.156    | -0.021                                              | -0.065      | -0.179  | -0.022                                                     | 0.002       | -0.266  |
|                                      | (0.179)                                                                      | (0.132)     | (0.616) | (0.723)                  | (0.389)     | (0.477)  | (0.417)                                             | (0.702)     | (0.463) | (0.308)                                                    | (0.989)     | (0.263) |
| <b>Gender</b>                        | -0.961                                                                       | -0.125      | 2.119*  | 0.643                    | 0.935       | -0.361   | 0.917                                               | 0.314       | 1.108   | 1.160*                                                     | 0.307       | 0.984   |
|                                      | (0.204)                                                                      | (0.879)     | (0.010) | (0.308)                  | (0.134)     | (0.522)  | (0.159)                                             | (0.612)     | (0.060) | (0.034)                                                    | (0.617)     | (0.085) |
| <b>Race/ethnicity</b>                |                                                                              |             |         |                          |             |          |                                                     |             |         |                                                            |             |         |
| Black/African American               | -1.118                                                                       | 4.169***    | 0.535   | 0.562                    | 3.355       | 0.809    | 0.258                                               | -0.395      | 0.699   | 1.085                                                      | 0.209       | 0.101   |
|                                      | (0.360)                                                                      | (0.000)     | (0.713) | (0.611)                  | (0.179)     | (0.400)  | (0.810)                                             | (0.863)     | (0.595) | (0.201)                                                    | (0.920)     | (0.923) |
| Hispanic                             | 0.604                                                                        | -0.032      | -1.873* | -1.119                   | 2.391**     | -0.460   | 0.024                                               | -0.213      | 1.498   | 0.223                                                      | -0.972      | 1.279   |
|                                      | (0.608)                                                                      | (0.975)     | (0.025) | (0.223)                  | (0.003)     | (0.567)  | (0.980)                                             | (0.783)     | (0.099) | (0.817)                                                    | (0.178)     | (0.202) |
| All other                            | 1.584                                                                        | 1.484       | 0.331   | 1.095                    | -0.423      | -0.884   | 0.157                                               | -0.210      | 1.501   | 2.161                                                      | 0.654       | 2.349** |
|                                      | (0.365)                                                                      | (0.202)     | (0.800) | (0.310)                  | (0.643)     | (0.321)  | (0.917)                                             | (0.830)     | (0.087) | (0.091)                                                    | (0.490)     | (0.006) |
| <b>College graduate or greater</b>   | 0.742                                                                        | 0.489       |         | -0.105                   | -0.935      |          | -0.741                                              | 0.163       |         | -0.104                                                     | 0.419       |         |
|                                      | (0.336)                                                                      | (0.588)     |         | (0.870)                  | (0.197)     |          | (0.220)                                             | (0.808)     |         | (0.852)                                                    | (0.547)     |         |
| <b>Income</b>                        |                                                                              |             |         |                          |             |          |                                                     |             |         |                                                            |             |         |
| Between \$25,000 and \$49,999        | 0.242                                                                        | -0.582      |         | -0.899                   | 1.284       |          | -0.565                                              | 0.772       |         | 0.754                                                      | 0.594       |         |

|                                                           |         |          |     |         |         |     |         |         |     |           |         |     |
|-----------------------------------------------------------|---------|----------|-----|---------|---------|-----|---------|---------|-----|-----------|---------|-----|
|                                                           | (0.823) | (0.589)  |     | (0.359) | (0.140) |     | (0.588) | (0.292) |     | (0.405)   | (0.429) |     |
| Between \$50,000 and \$74,999                             | 0.553   | -0.252   |     | -1.354  | 1.282   |     | -0.191  | -0.270  |     | 0.485     | -0.201  |     |
|                                                           | (0.576) | (0.813)  |     | (0.174) | (0.196) |     | (0.850) | (0.777) |     | (0.603)   | (0.821) |     |
| More than \$75,000                                        | 0.051   | -1.236   |     | -0.097  | -0.098  |     | 0.156   | -1.257  |     | -0.755    | -0.995  |     |
|                                                           | (0.956) | (0.241)  |     | (0.921) | (0.898) |     | (0.875) | (0.123) |     | (0.419)   | (0.233) |     |
| Are you planning to stop smoking within the next 30 days? | 1.449*  | 3.340*** |     | 0.952   | -0.441  |     | 0.634   | 0.007   |     | 1.560**   | -0.133  |     |
|                                                           | (0.034) | (0.000)  |     | (0.125) | (0.542) |     | (0.344) | (0.991) |     | (0.007)   | (0.836) |     |
| Smoked in the past 30 days                                |         |          |     | 0.650   |         |     | 0.716   |         |     | -2.993*** |         |     |
|                                                           |         |          |     | (0.486) |         |     | (0.251) |         |     | (0.000)   |         |     |
| Observations                                              | 215     | 202      | 204 | 215     | 202     | 205 | 215     | 202     | 205 | 215       | 202     | 205 |

p-values in parentheses

\* p<0.05, \*\* p<0.01, \*\*\* p<0.001
